# Supplementary material for: Logging Affects Genetic Diversity Parameters in an Araucaria angustifolia Population: An Endangered Species in Southern Brazil
Source: MDPI journal article supplement (doi:10.3390/f14051046), 2023-05-18
Supplement: s1 [file s1]

## Supplementary material

**Table S1** Number of *Araucaria angustifolia* adults, females, males, juveniles, and seedlings sampled (*n*), and logging intensity (LI) in blocks in scenarios of pre-logging (Pre), logged, and post-logging (Post) in three sample blocks (B13, B15, B20) and total sample of a remnant of Araucaria Forest located in Fernandes Pinheiro County, Parana state, Brazil.

| Scenario | Sample size ( <i>n</i> ) |         |       | DBH (cm) |         |       | Sample size ( <i>n</i> ) |           | Total |
|----------|--------------------------|---------|-------|----------|---------|-------|--------------------------|-----------|-------|
|          | Adults                   | Females | Males | Adults   | Females | Males | Juveniles                | Seedlings |       |
| B13      |                          |         |       |          |         |       |                          |           | 136   |
| Pre      | 68                       | 35      | 33    | 48.6     | 52.4    | 44.6  | 25                       | -         | 93    |
| Logged   | 22                       | 12      | 10    | 53.6     | 56.1    | 50.6  | -                        | -         | 22    |
| LI (%)   | 32.3                     | 34.3    | 30.3  | -        | -       | -     | -                        | -         | -     |
| Post     | 46                       | 23      | 23    | 46.2     | 50.5    | 42    | 25                       | 43        | 114   |
| B15      |                          |         |       |          |         |       |                          |           | 121   |
| Pre      | 51                       | 20      | 31    | 44.3     | 46.3    | 43    | 30                       | -         | 174   |
| Logged   | 16                       | 2       | 14    | 48.6     | 55.4    | 47.6  | -                        | -         | 16    |
| LI (%)   | 31.4                     | 10      | 45.2  | -        | -       | -     | -                        | -         | -     |
| Post     | 35                       | 18      | 17    | 42.3     | 45.2    | 39.2  | 30                       | 40        | 105   |
| B20      |                          |         |       |          |         |       |                          |           | 93    |
| Pre      | 38                       | 19      | 19    | 47.3     | 50.2    | 44.4  | 23                       | -         | 61    |
| Logged   | 7                        | 3       | 4     | 53.2     | 51.7    | 54.4  | -                        | -         | 7     |
| LI (%)   | 18.4                     | 15.8    | 22.1  | -        | -       | -     | -                        | -         | -     |
| Post     | 31                       | 16      | 15    | 46       | 49.7    | 41.4  | 23                       | 32        | 86    |
| Total    |                          |         |       |          |         |       |                          |           | 350   |
| Pre      | 157                      | 74      | 83    | 46.8     | 50.2    | 43.9  | 78                       | 115       | 235   |
| Logged   | 45                       | 17      | 28    | 51.8     | 55.2    | 49.6  | -                        | -         | 45    |
| LI (%)   | 28.7                     | 23      | 33.7  | -        | -       | -     | -                        | -         | -     |
| Post     | 112                      | 57      | 55    | 44.9     | 46.8    | 41    | 78                       | 115       | 305   |

DBH is the mean of diameter at breast height.

**Table S2** Sample size ( $n$ ) and number of pairs ( $N_{\text{pairs}}$ ) of adults (A), adults + juveniles (A+J) and adults + juveniles + seedlings (A+J+S) pre- and post-logging by distance classes used in the analysis of the spatial genetic structure in blocks B13, B15 and B20.

| Sample           | $n$ |                    | Distance classes (m) |       |       |        | Total |
|------------------|-----|--------------------|----------------------|-------|-------|--------|-------|
| B13              |     |                    | -                    | 0-25  | 25-50 | 50-136 |       |
| Pre: Adults (A)  | 68  | $N_{\text{pairs}}$ | -                    | 374   | 824   | 1080   | 2278  |
| Post: Adults (A) | 46  | $N_{\text{pairs}}$ | -                    | 160   | 366   | 509    | 1035  |
| B15              |     |                    | -                    | 0-25  | 25-50 | 50-132 |       |
| Pre: Adults (A)  | 51  | $N_{\text{pairs}}$ | -                    | 198   | 486   | 591    | 1275  |
| Post: Adults (A) | 35  | $N_{\text{pairs}}$ | -                    | 98    | 246   | 251    | 595   |
| B20              |     |                    | -                    | 0-25  | 25-50 | 50-141 |       |
| Pre: Adults (A)  | 38  | $N_{\text{pairs}}$ | -                    | 130   | 191   | 382    | 703   |
| Post: Adults (A) | 31  | $N_{\text{pairs}}$ | -                    | 75    | 131   | 259    | 465   |
| B13              |     |                    | 0-15                 | 15-25 | 25-50 | 50-136 |       |
| Pre: A+J         | 93  | $N_{\text{pairs}}$ | 277                  | 450   | 1520  | 2031   | 4278  |
| Post: A+J+S      | 114 | $N_{\text{pairs}}$ | 249                  | 371   | 1195  | 4626   | 6441  |
| B15              |     |                    | 0-15                 | 15-25 | 25-50 | 50-132 |       |
| Pre: A+J         | 81  | $N_{\text{pairs}}$ | 209                  | 327   | 1140  | 1564   | 3240  |
| Post: A+J+S      | 105 | $N_{\text{pairs}}$ | 454                  | 625   | 1794  | 2587   | 5460  |
| B20              |     |                    | 0-15                 | 15-25 | 25-50 | 50-141 |       |
| Pre: A+J         | 61  | $N_{\text{pairs}}$ | 162                  | 148   | 503   | 1017   | 1830  |
| Post: A+J+S      | 86  | $N_{\text{pairs}}$ | 364                  | 411   | 999   | 1881   | 3655  |

**Table S3** Mean, minimum, and maximum distance between females (FF), males (MM), and females and males (FM) within and among blocks B13, B15 and B20 in pre- (Pre) and post-logging (Post) sceneries.

|              |         | Distance (m) |      |     |      |     |      |
|--------------|---------|--------------|------|-----|------|-----|------|
|              |         | FF           | FF   | MM  | MM   | FM  | FM   |
|              |         | Pre          | Post | Pre | Post | Pre | Post |
| Within B13   | Mean    | 52           | 52   | 48  | 50   | 49  | 50   |
| Within B13   | Minimum | 5            | 6    | 3   | 3    | 2   | 2    |
| Within B13   | Maximum | 116          | 116  | 117 | 117  | 122 | 119  |
| Within B15   | Mean    | 55           | 52   | 47  | 40   | 52  | 51   |
| Within B15   | Minimum | 8            | 8    | 2   | 9    | 4   | 9    |
| Within B15   | Maximum | 122          | 117  | 113 | 99   | 126 | 126  |
| Within B20   | Mean    | 51           | 52   | 54  | 57   | 52  | 54   |
| Within B20   | Minimum | 5            | 5    | 4   | 6    | 2   | 5    |
| Within B20   | Maximum | 145          | 105  | 113 | 113  | 121 | 121  |
| Among blocks | Mean    | 282          | 276  | 279 | 283  | 280 | 280  |
| Among blocks | Minimum | 153          | 153  | 124 | 124  | 124 | 124  |
| Among blocks | Maximum | 403          | 402  | 433 | 433  | 425 | 424  |

**Table S4** Results of P-values for linkage genotypic disequilibrium for all *Araucaria angustifolia* samples (adults + juveniles + seedlings).

| Pairs of loci   | All samples | Pairs of loci   | All samples |
|-----------------|-------------|-----------------|-------------|
| Aang1 x Aang12  | 0.00353     | Aang15 x Ag20   | 0.18526     |
| Aang1 x Aang14  | 0.17981     | Aang15 x Ag56   | 0.06154     |
| Aang1 x Aang15  | 0.00865     | Aang15 x Ag62   | 0.23782     |
| Aang1 x Aang27  | 0.48718     | Aang27 x Aang28 | 0.1016      |
| Aang1 x Aang28  | 0.21987     | Aang27 x Aang37 | 0.63141     |
| Aang1 x Aang37  | 0.73718     | Aang27 x Aang43 | 0.62949     |
| Aang1 x Aang43  | 0.00256     | Aang27 x Aa1774 | 0.38814     |
| Aang1 x Aa1774  | 0.61154     | Aang27 x Aa5332 | 0.37244     |
| Aang1 x Aa5332  | 0.01891     | Aang27 x Ag20   | 0.57436     |
| Aang1 x Ag20    | 0.90256     | Aang27 x Ag56   | 0.50865     |
| Aang1 x Ag56    | 0.22115     | Aang27 x Ag62   | 0.06891     |
| Aang1 x Ag62    | 0.50032     | Aang28 x Aang37 | 0.07276     |
| Aang12 x Aang14 | 0.01026     | Aang28 x Aang43 | 0.12949     |
| Aang12 x Aang15 | 0.00481     | Aang28 x Aa1774 | 0.29487     |
| Aang12 x Aang27 | 0.225       | Aang28 x Aa5332 | 0.1         |
| Aang12 x Aang28 | 0.16026     | Aang28 x Ag20   | 0.47115     |
| Aang12 x Aang37 | 0.73814     | Aang28 x Ag56   | 0.51506     |
| Aang12 x Aang43 | 0.27949     | Aang28 x Ag62   | 0.01571     |
| Aang12 x Aa1774 | 0.09744     | Aang37 x Aang43 | 0.22115     |
| Aang12 x Aa5332 | 0.00353     | Aang37 x Aa1774 | 0.06667     |
| Aang12 x Ag20   | 0.24455     | Aang37 x Aa5332 | 0.12436     |
| Aang12 x Ag56   | 0.29776     | Aang37 x Ag20   | 0.12853     |
| Aang12 x Ag62   | 0.00128     | Aang37 x Ag56   | 0.22244     |
| Aang14 x Aang15 | 0.67083     | Aang37 x Ag62   | 0.01122     |
| Aang14 x Aang27 | 0.3734      | Aang43 x Aa1774 | 0.05929     |
| Aang14 x Aang28 | 0.45865     | Aang43 x Aa5332 | 0.0016      |
| Aang14 x Aang37 | 0.90353     | Aang43 x Ag20   | 0.0016      |
| Aang14 x Aang43 | 0.33942     | Aang43 x Ag56   | 0.0484      |
| Aang14 x Aa1774 | 0.21218     | Aang43 x Ag62   | 0.10513     |
| Aang14 x Aa5332 | 0.50417     | Aa1774 x Aa5332 | 0.81218     |
| Aang14 x Ag20   | 0.80641     | Aa1774 x Ag20   | 0.00064     |
| Aang14 x Ag56   | 0.62821     | Aa1774 x Ag56   | 0.19167     |
| Aang14 x Ag62   | 0.37179     | Aa1774 x Ag62   | 0.01186     |
| Aang15 x Aang27 | 0.05577     | Aa5332 x Ag20   | 0.51699     |
| Aang15 x Aang28 | 0.41891     | Aa5332 x Ag56   | 0.04712     |
| Aang15 x Aang37 | 0.30737     | Aa5332 x Ag62   | 0.11282     |
| Aang15 x Aang43 | 0.12532     | Ag20 x Ag56     | 0.01218     |
| Aang15 x Aa1774 | 0.22436     | Ag20 x Ag62     | 0.00705     |
| Aang15 x Aa5332 | 0.16122     | Ag56 x Ag62     | 0.07308     |

P-value for genotypic disequilibrium based on 4680 permutations. Adjusted P-value for 5% significance level was 0.000321.

**Table S5** Genetic diversity per locus and mean loci, estimate of frequency of null alleles ( $Freq_{(null)}$ ) and the fixation index uncorrected ( $F$ ) and corrected for null alleles ( $F_{null}$ ) for 13 microsatellite loci analyzed in pre- and post-logging scenarios in an *Araucaria angustifolia* population located in Fernandes Pinheiro County, Parana state, Brazil.

| Locus            | $n$ | $K$  | $H_o$ | $H_e$ | $F$     | $Freq_{(null)} \pm 1.96SE$ | $F_{null}$ |
|------------------|-----|------|-------|-------|---------|----------------------------|------------|
| <b>Adults</b>    |     |      |       |       |         |                            |            |
| Aang01           | 154 | 18   | 0.882 | 0.925 | 0.047   | -                          | 0.047      |
| Aang12           | 147 | 21   | 0.8   | 0.933 | 0.143*  | 0.155 $\pm$ 0.088*         | 0.053      |
| Aang14           | 155 | 8    | 0.89  | 0.829 | -0.073  | -                          | -0.073     |
| Aang15           | 153 | 17   | 0.94  | 0.931 | -0.01   | -                          | 0.01       |
| Aang27           | 156 | 6    | 0.881 | 0.82  | -0.074  | -                          | -0.074     |
| Aang28           | 157 | 5    | 0.874 | 0.729 | -0.199* | -                          | -0.199     |
| Aang37           | 156 | 3    | 0.663 | 0.513 | -0.293  | -                          | -0.293     |
| Aang43           | 156 | 12   | 0.782 | 0.661 | -0.183  | -                          | -0.183     |
| Aa1774           | 157 | 4    | 0.596 | 0.444 | -0.343* | -                          | -0.343*    |
| Aa5332           | 151 | 18   | 0.887 | 0.908 | 0.023   | -                          | 0.023      |
| Ag20             | 155 | 8    | 0.754 | 0.735 | -0.026  | -                          | -0.026     |
| Ag56             | 157 | 6    | 0.857 | 0.764 | -0.122  | -                          | -0.122     |
| Ag62             | 155 | 14   | 0.822 | 0.836 | 0.017   | -                          | 0.017      |
| Mean             | -   | 10.8 | 0.818 | 0.771 | -0.06*  | -                          | -0.068     |
| SD               | -   | 6.2  | 0.098 | 0.156 | 0.14    | -                          | 0.128      |
| <b>Juveniles</b> |     |      |       |       |         |                            |            |
| Aang01           | 78  | 16   | 0.964 | 0.92  | -0.048  | -                          | -          |
| Aang12           | 75  | 18   | 0.846 | 0.925 | 0.085   | -                          | -          |
| Aang14           | 78  | 7    | 0.891 | 0.841 | -0.06   | -                          | -          |
| Aang15           | 77  | 16   | 0.963 | 0.909 | -0.059  | -                          | -          |
| Aang27           | 78  | 6    | 0.891 | 0.825 | -0.08   | -                          | -          |
| Aang28           | 78  | 5    | 0.873 | 0.742 | -0.176  | -                          | -          |
| Aang37           | 78  | 3    | 0.581 | 0.547 | -0.063  | -                          | -          |
| Aang43           | 78  | 10   | 0.709 | 0.639 | -0.11   | -                          | -          |
| Aa1774           | 78  | 4    | 0.346 | 0.333 | -0.038  | -                          | -          |
| Aa5332           | 77  | 18   | 0.944 | 0.889 | -0.062  | -                          | -          |
| Ag20             | 78  | 7    | 0.818 | 0.745 | -0.098  | -                          | -          |
| Ag56             | 78  | 6    | 0.818 | 0.76  | -0.076  | -                          | -          |
| Ag62             | 78  | 13   | 0.818 | 0.794 | -0.033  | -                          | -          |
| Mean             | -   | 9.6  | 0.805 | 0.759 | -0.06   | -                          | -          |
| SD               | -   | 5.5  | 0.174 | 0.17  | 0.058   | -                          | -          |
| <b>Seedlings</b> |     |      |       |       |         |                            |            |
| Aang01           | 115 | 16   | 0.965 | 0.924 | -0.044  | -                          | -          |
| Aang12           | 106 | 20   | 0.908 | 0.929 | 0.023   | -                          | -          |
| Aang14           | 115 | 8    | 0.879 | 0.839 | -0.048  | -                          | -          |
| Aang15           | 114 | 17   | 0.951 | 0.912 | -0.043  | -                          | -          |
| Aang27           | 115 | 6    | 0.891 | 0.814 | -0.095  | -                          | -          |
| Aang28           | 114 | 5    | 0.88  | 0.72  | -0.222  | -                          | -          |
| Aang37           | 115 | 3    | 0.41  | 0.484 | 0.115   | -                          | -          |
| Aang43           | 115 | 12   | 0.626 | 0.608 | -0.03   | -                          | -          |
| Aa1774           | 115 | 3    | 0.373 | 0.364 | -0.025  | -                          | -          |
| Aa5332           | 115 | 19   | 0.964 | 0.909 | -0.061  | -                          | -          |
| Ag20             | 115 | 8    | 0.819 | 0.775 | -0.057  | -                          | -          |
| Ag56             | 115 | 6    | 0.844 | 0.757 | -0.115  | -                          | -          |
| Ag62             | 115 | 14   | 0.783 | 0.749 | -0.045  | -                          | -          |
| Mean             | -   | 10.5 | 0.972 | 0.753 | -0.052* | -                          | -          |
| SD               | -   | 6.1  | 0.199 | 0.175 | 0.083   | -                          | -          |

$n$  is the sample size;  $K$  is the total number of alleles;  $H_o$  and  $H_e$  are the observed and expected heterozygosity, respectively; SE is the 95% confidence interval; SD is the standard error; \*P< 0.05.
